# Supplementary material for: A Plasmodium cysteine protease required for efficient transition from the liver infection stage
Source: PubMed Central journal article supplement (PMC7529260; doi:10.1371/journal.ppat.1008891), 2020-09-21
Supplement: ppat.1008891.s001.pdf [file ppat.1008891.s001.pdf]

**S1 Table. Oligonucleotides used in this study.**

| Experiment                                   | Oligonucleotide      | Sequence 5' → 3'                                         |                                        |     |
|----------------------------------------------|----------------------|----------------------------------------------------------|----------------------------------------|-----|
| RT PCR                                       | <i>SERA4_for</i>     | CGAAGTAAGAAACAAAGGTTTCAG                                 |                                        |     |
|                                              | <i>SERA4_rev</i>     | GGTTGCCAAACAATATCCAGGAGAAGTG                             |                                        |     |
|                                              | <i>TRAP_for</i>      | CCCGGATCCATGAAGCTCTTAGGAAATAG                            |                                        |     |
|                                              | <i>TRAP_rev</i>      | GTGTGGATCCTTCCTGACAAACTTTAGAAAG                          |                                        |     |
|                                              | <i>GAPDH_for</i>     | ATGGCAATAACAAAAGTCGGAATTAATGG                            |                                        |     |
|                                              | <i>GAPDH_rev</i>     | TGTGGATAGCCAAATCTAAAAGACGG                               |                                        |     |
|                                              | <i>MSP1_for</i>      | CTGGTTTGGTAGGAGAAGGCCAATC                                |                                        |     |
|                                              | <i>MSP1_rev</i>      | AGCTACAGAATACACCATCATAAT                                 |                                        |     |
| qPCR                                         | <i>Pb18S_for</i>     | AAGCATTAAATAAAGCGAATACATCCTTAC                           |                                        |     |
|                                              | <i>Pb18S_rev</i>     | GGAGATTGGTTTTGACGTTTATGTG                                |                                        |     |
|                                              | mHPRT for            | TGCTCGAGATGTGATGAAGG                                     |                                        |     |
|                                              | mHPRT rev            | TCCCCTGTTGACTGGTCATT                                     |                                        |     |
|                                              | <i>SERA3_for</i>     | GTTGATGTTTTAGGTCCAGATAATTGTG                             |                                        |     |
|                                              | <i>SERA3_rev</i>     | GTGGTAAAAATTTGAAGTGGTTGTGG                               |                                        |     |
| <b>SERA4 targeting vectors</b>               | mCh-SERA4for         | ATAAGAAT <u>GCGGCCG</u> CACGAGATTGACAATGAAAATGAAATAA TGG |                                        |     |
|                                              | mCh-SERA4rev         | TGCTCTAGATATGCTGCAAAGAAACAATCTTCACC                      |                                        |     |
|                                              | SERA4rep1for         | <u>GGGGTACC</u> CACAATTGAAGAGGAATGACGAAAAAGGA            |                                        |     |
|                                              | SERA4rep2rev         | GCCCAAGCTTCATTGGGTGGTTTTGAGGTTTGCCT                      |                                        |     |
|                                              | SERA4rep3for         | CGCGGATCCGTACGTGGATAGGAACTTTTAAAGGTA                     |                                        |     |
|                                              | SERA4rep4rev         | TCCC <u>GCGGCC</u> CAACCCAATGATAAGTACAGTCATGCA           |                                        |     |
| Tests for selected parasites                 | <i>Sera4tag_for</i>  | ATATGAAAAGCTTAGAAACCCAGC                                 |                                        |     |
|                                              | <i>Sera4tag_rev</i>  | TACCTTTAAAAGTTTCCTATCCACG                                |                                        |     |
|                                              | <i>Mcherry_rev</i>   | GATCCTTACTTGTACAGC                                       |                                        |     |
|                                              | T7                   | GTAATACGACTCACTATAGGGC                                   |                                        |     |
|                                              | <i>Sera4test_for</i> | ACATTTAGCGCATGTTGAATGCTTATACAGC                          |                                        |     |
|                                              | <i>DHFR_rev</i>      | CGCATTATATGAGTTCATTTTACACAATCC                           |                                        |     |
|                                              | <i>Sera4test_rev</i> | GGATCCATACCTTGATTTATCAGATTGAT                            |                                        |     |
|                                              | <i>DHFR_for</i>      | CCCACGACGACGAATCCAGATGG                                  |                                        |     |
| <b>PbSERA-promoter-driven GFP expression</b> | <i>SERA4-5 for</i>   | TCCC <u>GCGGTGG</u> GAACGCTGTAAAAATCA                    |                                        |     |
|                                              | <i>SERA4-5 rev</i>   | CATGCCATGGTTTGTACAATAATTTAATCTTGAAACATTTTAC TTCA         |                                        |     |
|                                              | <i>SERA5-5 for</i>   | CGTCTAGACGGCTTGTAGTAATTTATAACT                           |                                        |     |
|                                              | <i>SERA5-5 rev</i>   | TATCCATGGCTTCCGTTATTTTAAAAGTTTGTC                        |                                        |     |
| <b>Recombi-nant protein expression</b>       | <i>SERA4-M-for</i>   | TGTGGATCCTTCACAGCAAATGCAAAGAA                            | protein                                | tag |
|                                              | <i>SERA4-M-rev</i>   | TGTCTCGAGCATGAGCATCTAATGTGCCACT                          | Phe <sup>216</sup> -His <sup>365</sup> | GST |
|                                              | <i>SERA4-N-for</i>   | TTGAATTCCACGAAATTAATACGCAAACCT                           | His <sup>20</sup> -Asn <sup>188</sup>  | GST |
|                                              | <i>SERA4-N-rev</i>   | GAATGCGGCCGCTCATTAGTGTGTGTTTCCCATT                       |                                        |     |
|                                              | <i>SERA1-M-for</i>   | TTCGGATCCTATTGCAATGATGAATATTGTGACAG                      | Tyr <sup>586</sup> -Tyr <sup>869</sup> | MBP |
|                                              | <i>SERA1-M-rev</i>   | AACTGCAGTCAGTAAAAATCAGGAGATATTTTGA                       |                                        |     |
|                                              | <i>SERA2-M-for</i>   | TGAATTCAAACATGTAGAACAATGGGTTGC                           | Lys <sup>546</sup> -Pro <sup>714</sup> | GST |
|                                              | <i>SERA2-M-rev</i>   | TGTGGCGGCCGCTATGGATAATTGGATTGAGTTGG                      |                                        |     |
|                                              | <i>SERA3-M-for</i>   | CGGGATCCAAAGTAACTGCTCAAAGTGATGAAGA                       | Trp <sup>620</sup> -Ser <sup>875</sup> | MBP |
|                                              | <i>SERA3-M-rev</i>   | AACTGCAGAATTGAATCACTATCTGGCTCCAT                         |                                        |     |

Restriction sites are underlined. For recombinant proteins production, the amino acid position of the respective *PbSERA* proteins and the fusion tag for subsequent purification (MBP or GST) are indicated.
