# Supplementary material for: A Plasmodium cysteine protease required for efficient transition from the liver infection stage
Source: PubMed Central journal article supplement (PMC7529260; doi:10.1371/journal.ppat.1008891), 2020-09-21
Supplement: ppat.1008891.s002.pdf [file ppat.1008891.s002.pdf]

**S2 Table. Infectivity of *Pbsera4(-)* sporozoites.**

| Sporozoite dose | Parasite line           | No. infected animals/<br>No. injected animals |                    | Time to patency (days) |                    |
|-----------------|-------------------------|-----------------------------------------------|--------------------|------------------------|--------------------|
|                 |                         | SD Rat                                        | C57BL/6            | SD Rat                 | C57BL/6            |
| 1,000           | wildtype-NK65           | 2/2                                           | 4/4                | 3.0                    | 3.5                |
|                 | <i>Pbsera4(-)</i> -NK65 | 2/2                                           | 3/13               | 7.0                    | (8.3)              |
| 10,000          | wildtype-ANKA           | 9/9                                           | 10/10 <sup>a</sup> | 3.0                    | 3.5 <sup>a</sup>   |
|                 | <i>Pbsera4(-)</i> -ANKA | 11/13                                         | 10/10 <sup>a</sup> | (5.1)                  | 5.0 <sup>a</sup>   |
|                 | wildtype-NK65           | 5/5                                           | 8/8 <sup>b</sup>   | 3.3                    | 3.5 <sup>b</sup>   |
|                 | <i>Pbsera4(-)</i> -NK65 | 3/4                                           | 15/26 <sup>b</sup> | (7.0)                  | (7.6) <sup>b</sup> |
| 100,000         | wildtype-ANKA           | 1/1                                           | 3/3                | 3.0                    | 3.0                |
|                 | <i>Pbsera4(-)</i> -ANKA | 1/1                                           | 3/3                | 5.0                    | 4.6                |
| mosquito bite   | wildtype-NK65           | 2/2                                           | 2/2                | 3.0                    | 3.0                |
|                 | <i>Pbsera4(-)</i> -NK65 | 2/2                                           | 2/2                | 7.0                    | 7.0                |

No. infected animals/No. injected animals indicates the number of animals in which blood-stage infection was detected relative to the number that were injected with the indicated numbers of sporozoites.

Time to patency is the mean number of days between infection and detection of blood-stage *P. berghei*. Parentheses indicate that not all animals became blood smear-positive.

<sup>a</sup> The data are displayed in Figure 3D.

<sup>b</sup> The data are displayed in Figure 5A.
