# Supplementary material for: A Plasmodium cysteine protease required for efficient transition from the liver infection stage
Source: PubMed Central journal article supplement (PMC7529260; doi:10.1371/journal.ppat.1008891), 2020-09-21
Supplement: ppat.1008891.s003.pdf [file ppat.1008891.s003.pdf]

**S3 Table. Infectivity of *in vitro*-generated *Pbsera4(-)* merozoites in mice**

| Exp. | Parasite line           | Average no. merozoites released per well | No. merozoites injected per animal | No. infected animals/no. injected animals | Time to patency (days) |
|------|-------------------------|------------------------------------------|------------------------------------|-------------------------------------------|------------------------|
| I    | wildtype-ANKA           | 5,360                                    | 500                                | 3/3                                       | 4.0                    |
|      | <i>Pbsera4(-)</i> -ANKA | 2,350                                    | 500                                | 3/3                                       | 4.6                    |
| II   | wildtype-ANKA           | 3,100                                    | 500                                | 3/3                                       | 4.3                    |
|      | <i>Pbsera4(-)</i> -ANKA | 430                                      | 500                                | 3/3                                       | 5.0                    |
| III  | wildtype-ANKA           | 2,700                                    | 2,700                              | 1/1                                       | 3.0                    |
|      | <i>Pbsera4(-)</i> -ANKA | 1,930                                    | 1930                               | 1/1                                       | 3.0                    |
| IV   | wildtype-ANKA           | 650                                      | 650                                | 2/2                                       | 6.0                    |
|      | <i>Pbsera4(-)</i> -ANKA | 550                                      | 550                                | 2/2                                       | 6.0                    |
| V    | wildtype-ANKA           | 200                                      | 100                                | 2/2                                       | 5.0                    |
|      | <i>Pbsera4(-)</i> -ANKA | 46                                       | 92                                 | 2/2                                       | 5.0                    |

Exp. indicates separate experiments.

The data in column 3 (Average no. merozoites released per well) are displayed graphically in Figure 4C where the values are normalized to wildtype-ANKA.

No. infected animals/No. injected animals indicates the number of animals in which blood-stage infection was detected relative to the number that were injected with merozoites.

Time to patency is the mean number of days between infection and detection of blood-stage *P. berghei*.
