# Supplementary material for: A Plasmodium cysteine protease required for efficient transition from the liver infection stage
Source: PubMed Central journal article supplement (PMC7529260; doi:10.1371/journal.ppat.1008891), 2020-09-21
Supplement: ppat.1008891.s004.pdf [file ppat.1008891.s004.pdf]

**S4 Table. Immunizations of C57BL/6 mice with *Pbsera4(-)*-NK65 sporozoites**

| No. of <i>Pbsera4(-)</i> -NK65 sporozoites injected for immunizations | Boost (day after initial immunization / no. of sporozoites)                           | No. protected / No. challenged   |                                   | Protection (%)<br>2 months / 20months |
|-----------------------------------------------------------------------|---------------------------------------------------------------------------------------|----------------------------------|-----------------------------------|---------------------------------------|
|                                                                       |                                                                                       | 2 months since last immunization | 20 months since last immunization |                                       |
| <b>10,000</b>                                                         | 1 <sup>st</sup> (14/10,000), 2 <sup>nd</sup> (28/10,000)                              | 5/5                              | 0/5                               | <b>100/0</b>                          |
|                                                                       | 1 <sup>st</sup> (14/10,000), 2 <sup>nd</sup> (28/10,000),<br>WT challenge (89/10,000) | n.a.                             | 5/5                               | n.a./ <b>100</b>                      |
| <b>naive</b>                                                          | --                                                                                    | 0/3                              | 0/3                               | <b>0/0</b>                            |
| <b>1,000</b>                                                          | 1 <sup>st</sup> (14/1,000), 2 <sup>nd</sup> (28/1,000)                                | 1/4                              | 0/6                               | <b>25/0</b>                           |
|                                                                       | 1 <sup>st</sup> (14/1,000), 2 <sup>nd</sup> (28/1,000),<br>WT challenge (89/10,000)   | n.a.                             | 0/1                               | n.a./ <b>0</b>                        |
| <b>naive</b>                                                          | --                                                                                    | 0/2                              | 0/3                               | <b>0/0</b>                            |

“WT challenge” indicates that animals received a dose of 10,000 wildtype sporozoites at the indicated time-point and remained blood-stage negative (these are the protected animals in the preceding row). No. protected / No. challenged indicates the number of animals that did not develop a blood-stage infection of those that received the challenge dose of 10,000 wildtype sporozoites.
